# Supplementary material
Source: PubMed Central journal article supplement (PMC5391465)
Supplement: JVI.00177-17_zjv999182551s1.pdf [file JVI.00177-17_zjv999182551s1.pdf]

1 **SUPPLEMENTARY INFORMATION**

2

3 **Table S1**

4

| <b>Subunit</b> | <b>Domain</b>            | <b>position</b> | <b>EBOV1976-GP</b> | <b>EBOV2014-GP</b> |
|----------------|--------------------------|-----------------|--------------------|--------------------|
| GP1            | Receptor binding domain  | 82              | alanine            | valine             |
|                | Glycan cap               | 262             | threonine          | alanine            |
|                |                          | 310             | valine             | alanine            |
|                | Mucin-like domain        | 315             | alanine            | proline            |
|                |                          | 331             | glycine            | glutamic acid      |
|                |                          | 336             | threonine          | asparagine         |
|                |                          | 359             | glutamic acid      | lysine             |
|                |                          | 377             | serine             | proline            |
|                |                          | 378             | leucine            | proline            |
|                |                          | 382             | proline            | threonine          |
|                |                          | 405             | glutamic acid      | glycine            |
|                |                          | 411             | threonine          | alanine            |
|                |                          | 422             | serine             | proline            |
|                |                          | 430             | proline            | leucine            |
|                |                          | 441             | threonine          | alanine            |
|                |                          | 443             | phenylalanine      | serine             |
| 446            | proline                  | leucine         |                    |                    |
| 455            | histidine                | tyrosine        |                    |                    |
| GP2            | Pre-internal fusion loop | 503             | alanine            | valine             |
|                | Internal fusion loop     | 544             | isoleucine         | threonine          |

5

6 **Table S1: Amino acid differences between EBOV1976-GP and EBOV2014-GP.**

7 Shown are the location of amino acid polymorphisms between EBOV1976-GP and EBOV2014-  
8 GP in distinct domain of the EBOV-GP subunits 1 (GP1) and 2 (GP2).  
9

| <b>Genus</b>        | <b>Species</b>               | <b>Sequence(s)</b>                                                                                                                                                                                                                                                                                                                                                                                                                                                                                                                                                                                                                                                                                                                                                                                                                                                        |
|---------------------|------------------------------|---------------------------------------------------------------------------------------------------------------------------------------------------------------------------------------------------------------------------------------------------------------------------------------------------------------------------------------------------------------------------------------------------------------------------------------------------------------------------------------------------------------------------------------------------------------------------------------------------------------------------------------------------------------------------------------------------------------------------------------------------------------------------------------------------------------------------------------------------------------------------|
| <i>Ebolavirus</i>   | <i>Zaire ebolavirus</i>      | KU182898.1, KU182899.1, KU182900.1, KU182901.1, KU182902.1, KU182903.1, KU182904.1, KU182905.1, KU182906.1, KU182907.1, KU182908.1, KU182909.1, KR819004.1, KR063671.1, KR063672.1, KF827427.1, KC242784.1, KC242785.1, KC242786.1, KC242787.1, KC242788.1, KC242789.1, KC242790.1, KC242791.1, L11365.1, U28077.1, U23187.1, U81161.1, U77384.1, NC_002549.1, AF086833.2, AF272001.1, AX092102.1, AY058898.1, AF499101.1, AY142960.1, AX717723.1, AY354458.1, AY526104.1, AY526101.1, AY526102.1, AY526100.1, AY526099.1, AY526098.1, EU051635.1, EU051634.1, EU051633.1, EU051632.1, EU051631.1, EU051630.1, EU224440.2, HQ849547.1, HQ613403.1, HQ613402.1, JQ352763.1, JC008053.1, KM655246.1, KM519951.1, KP271020.1, KP271019.1, KP271018.1, KC242801.1, KC242800.1, KC242799.1, KC242798.1, KC242797.1, KC242796.1, KC242795.1, KC242794.1, KC242793.1, KC242792.1 |
|                     | <i>Sudan ebolavirus</i>      | KC545389.1, JC008055.1, KC545390.1, KC545391.1, KC545392.1, JN638998.1, KC589025.1, AY316199.1, AY344234.1, AY729654.1, NC_006432.1, KR063670.1, KU182912.1, U23069.1, U28134.1, EU338380.1, KT750754.1, KC242783.2, KT878488.1, FJ968794.1                                                                                                                                                                                                                                                                                                                                                                                                                                                                                                                                                                                                                               |
|                     | <i>Bundibugyo ebolavirus</i> | KC545396.1, KC545395.1, KC545394.1, KC545393.1, FJ217161.1, KR063673.1, NC_014373.1, KU182911.1                                                                                                                                                                                                                                                                                                                                                                                                                                                                                                                                                                                                                                                                                                                                                                           |
|                     | <i>Tai Forest ebolavirus</i> | U28006.1, NC_014372.1, KU182910.1, FJ217162.1                                                                                                                                                                                                                                                                                                                                                                                                                                                                                                                                                                                                                                                                                                                                                                                                                             |
|                     | <i>Reston ebolavirus</i>     | FJ621584.1, JX477165.1, FJ621583.1, FJ621585.1, U23416.1, AB050936.1, JX477166.1, U23417.1, AF522874.1, NC_004161.1, AY769362.1, AF034645.1, U23152.1                                                                                                                                                                                                                                                                                                                                                                                                                                                                                                                                                                                                                                                                                                                     |
| <i>Marburgvirus</i> | <i>Marburg marburgvirus</i>  | JX458854.1, JX458853.1, JX458852.1, JX458851.1, JX458850.1, JX458849.1, JX458848.1, JX458847.1, JX458846.1, JX458845.1, JX458844.1, JX458843.1, JX458842.1, JX458841.1, JX458840.1, JX458839.1, JX458838.1, JX458837.1, JX458836.1, JX458835.1, JX458834.1, JX458833.1, JX458832.1, JX458831.1, JX458830.1, JX458829.1, JX458828.1, JX458827.1, JX458826.1, JX458825.1,                                                                                                                                                                                                                                                                                                                                                                                                                                                                                                   |

|                   |                          |                                                                                                                                                                                                                                                                                                                                                                                                                                                                                                                                                                                                                                                                                                                                                                    |
|-------------------|--------------------------|--------------------------------------------------------------------------------------------------------------------------------------------------------------------------------------------------------------------------------------------------------------------------------------------------------------------------------------------------------------------------------------------------------------------------------------------------------------------------------------------------------------------------------------------------------------------------------------------------------------------------------------------------------------------------------------------------------------------------------------------------------------------|
|                   |                          | KC545388.1, KC545387.1, KM261523.1, NC_024781.1, KP117261.1, KP117260.1, KP117259.1, KR063674.1, KR867677.1, KU179482.1, Z12132.1, AF005733.1, AX717721.1, AX717725.1, X68493.1, AY430365.1, AY430366.1, DQ447660.1, DQ447659.1, DQ447658.1, DQ447657.1, DQ447656.1, DQ447654.1, DQ447653.1, DQ447652.1, DQ447651.1, DQ217792.1, DQ466190.1, DQ466191.1, DQ466188.1, DQ466189.1, DQ466192.1, DQ466193.1, DQ466187.1, DQ466186.1, GQ433351.1, DQ447649.1, DQ447650.1, AY358025.2, AF005734.1, AF005735.1, NC_001608.3, Z29337.1, EU500826.1, EU500827.1, EF446132.1, EF446131.1, EU500828.1, FJ750959.1, FJ750958.1, FJ750957.1, FJ750956.1, FJ750955.1, FJ750954.1, FJ750953.1, GQ433353.1, GQ433352.1, JN408064.1, JX458858.1, JX458857.1, JX458856.1, JX458855.1 |
| <i>Cuevavirus</i> | <i>Lloviu cuevavirus</i> | JF828358.1 <sup>a</sup>                                                                                                                                                                                                                                                                                                                                                                                                                                                                                                                                                                                                                                                                                                                                            |

12

13 **Table S2: GenBank accession numbers for GP sequences used for sequence analysis.**

14 <sup>a</sup>, modified GP sequence to yield full-length, membrane-bound GP

15

16 **Table S3**

17

| <b>Accession no.</b> | <b>Virus/Sequence background</b>            | <b>Source of information</b> |
|----------------------|---------------------------------------------|------------------------------|
| KM655246.1           | Passaged (no information on cell line)      | (1)                          |
| EU224440.2           | Passaged (guinea pig)                       | (2)                          |
| U23187.1             | Lab strain, passaged (Vero E6)              | (3)                          |
| U31033.1             | Lab strain, passaged (Vero E6)              | (4, 5)                       |
| L11365.1             | Passaged (Vero E6)                          | (6, 7)                       |
| U77384.1             | Lab strain (passaged, Vero E6)              | (4)                          |
| NC_002549.1          | Lab strain, passaged (Vero E6)              | (4, 8-10)                    |
| AF086833.2           | Lab strain, passaged (Vero E6)              | (4, 8-10)                    |
| AF272001.1           | Lab strain, passaged (Vero E6, monkey, L68) | (11)                         |
| KU182898.1           | Passaged (Vero E6)                          | GenBank entry                |
| KU182899.1           | Passaged (Vero E6)                          | GenBank entry                |
| KU182900.1           | Passaged (Vero E6)                          | GenBank entry                |
| KU182901.1           | Passaged (Vero E6)                          | GenBank entry                |
| KU182902.1           | Passaged (Vero E6)                          | GenBank entry                |
| KU182903.1           | Passaged (Vero E6)                          | GenBank entry                |
| KU182904.1           | Passaged (Vero E6)                          | GenBank entry                |
| KU182905.1           | Passaged (Vero E6)                          | GenBank entry                |
| KU182906.1           | Passaged (Vero E6)                          | GenBank entry                |
| KU182907.1           | Passaged (Vero E6)                          | GenBank entry                |
| KU182908.1           | Passaged (Vero E6)                          | GenBank entry                |
| KU182909.1           | Passaged (Vero E6)                          | GenBank entry                |

18

19 **Table S3: Passage background of pre-epidemic EBOV containing I544.**

20 Summary of pre-epidemic EBOV whose GP harbors I544. Indicated is the accession number (left  
21 column), passage history the virus (middle column) and the respective references (right column).

22

23 **Table S4**

24

| <b>Accession no.</b> | <b>Virus/Sequence background</b>       | <b>Source of information</b> |
|----------------------|----------------------------------------|------------------------------|
| KR824525.1           | Passaged (no information on cell line) | (12)                         |
| KX000400.1           | Passaged (no information on cell line) | GenBank entry                |
| KP096422.1           | Passaged (Vero E6)                     | (13)                         |
| KX000399.1           | Passaged (no information on cell line) | GenBank entry                |
| KP096420.1           | Passaged (Vero E6)                     | (13)                         |
| KX000398.1           | Passaged (no information on cell line) | GenBank entry                |
| KT013258.3           | Sample material (Human blood)          | GenBank entry                |
| KT013254.3           | Sample material (Human blood)          | GenBank entry                |
| KT013255.3           | Sample material (Human blood)          | GenBank entry                |
| KT013259.3           | Sample material (Human blood)          | GenBank entry                |

25

26 **Table S4: Passage background of EBOV from the West African EVD epidemic that carry**  
 27 **I544 in their GP.**

28 Summary of EBOV isolates from the West African EVD epidemic whose GP harbors I544.

29 Indicated is the accession number (left column), information on the sample material or passage  
 30 history the virus (middle column), and the respective references (right column).

31

32 **REFERENCES**

33

- 34 1. **Kuhn JH, Lofts LL, Kugelman JR, Smither SJ, Lever MS, van der Groen G,**  
35 **Johnson KM, Radoshitzky SR, Bavari S, Jahrling PB, Towner JS, Nichol ST,**  
36 **Palacios G.** 2014. Reidentification of Ebola Virus E718 and ME as Ebola  
37 Virus/H.sapiens-tc/COD/1976/Yambuku-Ecran. *Genome Announc* **2**.
- 38 2. **Subbotina E, Dadaeva A, Kachko A, Chepurinov A.** 2010. Genetic factors of Ebola  
39 virus virulence in guinea pigs. *Virus Res* **153**:121-133.
- 40 3. **Sanchez A, Trappier SG, Mahy BW, Peters CJ, Nichol ST.** 1996. The virion  
41 glycoproteins of Ebola viruses are encoded in two reading frames and are expressed  
42 through transcriptional editing. *Proc Natl Acad Sci U S A* **93**:3602-3607.
- 43 4. **Volchkov VE, Becker S, Volchkova VA, Ternovoj VA, Kotov AN, Netesov SV, Klenk**  
44 **HD.** 1995. GP mRNA of Ebola virus is edited by the Ebola virus polymerase and by T7  
45 and vaccinia virus polymerases. *Virology* **214**:421-430.
- 46 5. **Volchkov VE, Blinov VM, Netesov SV.** 1992. The envelope glycoprotein of Ebola virus  
47 contains an immunosuppressive-like domain similar to oncogenic retroviruses. *FEBS Lett*  
48 **305**:181-184.
- 49 6. **Sanchez A, Kiley MP, Holloway BP, McCormick JB, Auperin DD.** 1989. The  
50 nucleoprotein gene of Ebola virus: cloning, sequencing, and in vitro expression. *Virology*  
51 **170**:81-91.
- 52 7. **Sanchez A, Kiley MP, Holloway BP, Auperin DD.** 1993. Sequence analysis of the  
53 Ebola virus genome: organization, genetic elements, and comparison with the genome of  
54 Marburg virus. *Virus Res* **29**:215-240.

- 55 8. **Volchkov VE, Feldmann H, Volchkova VA, Klenk HD.** 1998. Processing of the Ebola  
56 virus glycoprotein by the proprotein convertase furin. *Proc Natl Acad Sci U S A* **95**:5762-  
57 5767.
- 58 9. **Volchkov VE, Volchkova VA, Slenczka W, Klenk HD, Feldmann H.** 1998. Release of  
59 viral glycoproteins during Ebola virus infection. *Virology* **245**:110-119.
- 60 10. **Volchkov VE, Volchkova VA, Chepurinov AA, Blinov VM, Dolnik O, Netesov SV,**  
61 **Feldmann H.** 1999. Characterization of the L gene and 5' trailer region of Ebola virus. *J*  
62 *Gen Virol* **80 ( Pt 2)**:355-362.
- 63 11. **Volchkov VE, Chepurinov AA, Volchkova VA, Ternovoj VA, Klenk HD.** 2000.  
64 Molecular characterization of guinea pig-adapted variants of Ebola virus. *Virology*  
65 **277**:147-155.
- 66 12. **Sozhamannan S, Holland MY, Hall AT, Negron DA, Ivancich M, Koehler JW,**  
67 **Minogue TD, Campbell CE, Berger WJ, Christopher GW, Goodwin BG, Smith MA.**  
68 2015. Evaluation of Signature Erosion in Ebola Virus Due to Genomic Drift and Its  
69 Impact on the Performance of Diagnostic Assays. *Viruses* **7**:3130-3154.
- 70 13. **Hoenen T, Groseth A, Feldmann F, Marzi A, Ebihara H, Kobinger G, Gunther S,**  
71 **Feldmann H.** 2014. Complete genome sequences of three ebola virus isolates from the  
72 2014 outbreak in west Africa. *Genome Announc* **2**.
- 73  
74  
75
